# Supplementary material for: Refractive Outcomes of Non-Toric and Toric Intraocular Lenses in Mild, Moderate and Advanced Keratoconus: A Systematic Review and Meta-Analysis
Source: MDPI journal article supplement (doi:10.3390/jcm11092456), 2022-04-27
Supplement: s1 [file s1]

# **Refractive outcomes of non-toric and toric intraocular lenses in mild, moderate, and advanced keratoconus: a systematic review and meta-analysis**

Tal Yahalomi, MD<sup>1</sup>; Asaf Achiron, MD<sup>2</sup>; Idan Hecht, MD<sup>2,3</sup>; Roei Arnon, MD<sup>1</sup>; Elyia Levinger<sup>2,4</sup>, MD, Joseph Pikkil, MD<sup>1</sup>; Raimo Tuuminen, MD, PhD<sup>5,6</sup>

<sup>1</sup>Department of Ophthalmology, Samson Assuta Ashdod Hospital, Faculty of Health Sciences, Ben-Gurion University of the Negev, Israel

<sup>2</sup>Sackler Faculty of Medicine, Tel Aviv University, Tel Aviv, Israel

<sup>3</sup>Department of Ophthalmology, Shamir Medical, Zerifin, Israel

<sup>4</sup>Enaim Refractive Surgery Center, Jerusalem, Israel

<sup>5</sup>Department of Ophthalmology, Kymenlaakso Central Hospital, Kotka, Finland

<sup>6</sup>Helsinki Retina Research Group, Faculty of Medicine, University of Helsinki, Helsinki, Finland

**Short title:** Refractive outcomes in keratoconus

Supplement Figure S1.  
Flow diagram of inclusion process based on Preferred Reporting Items for Systematic Reviews and Meta-Analyses (PRISMA) guidelines<sup>17</sup>.

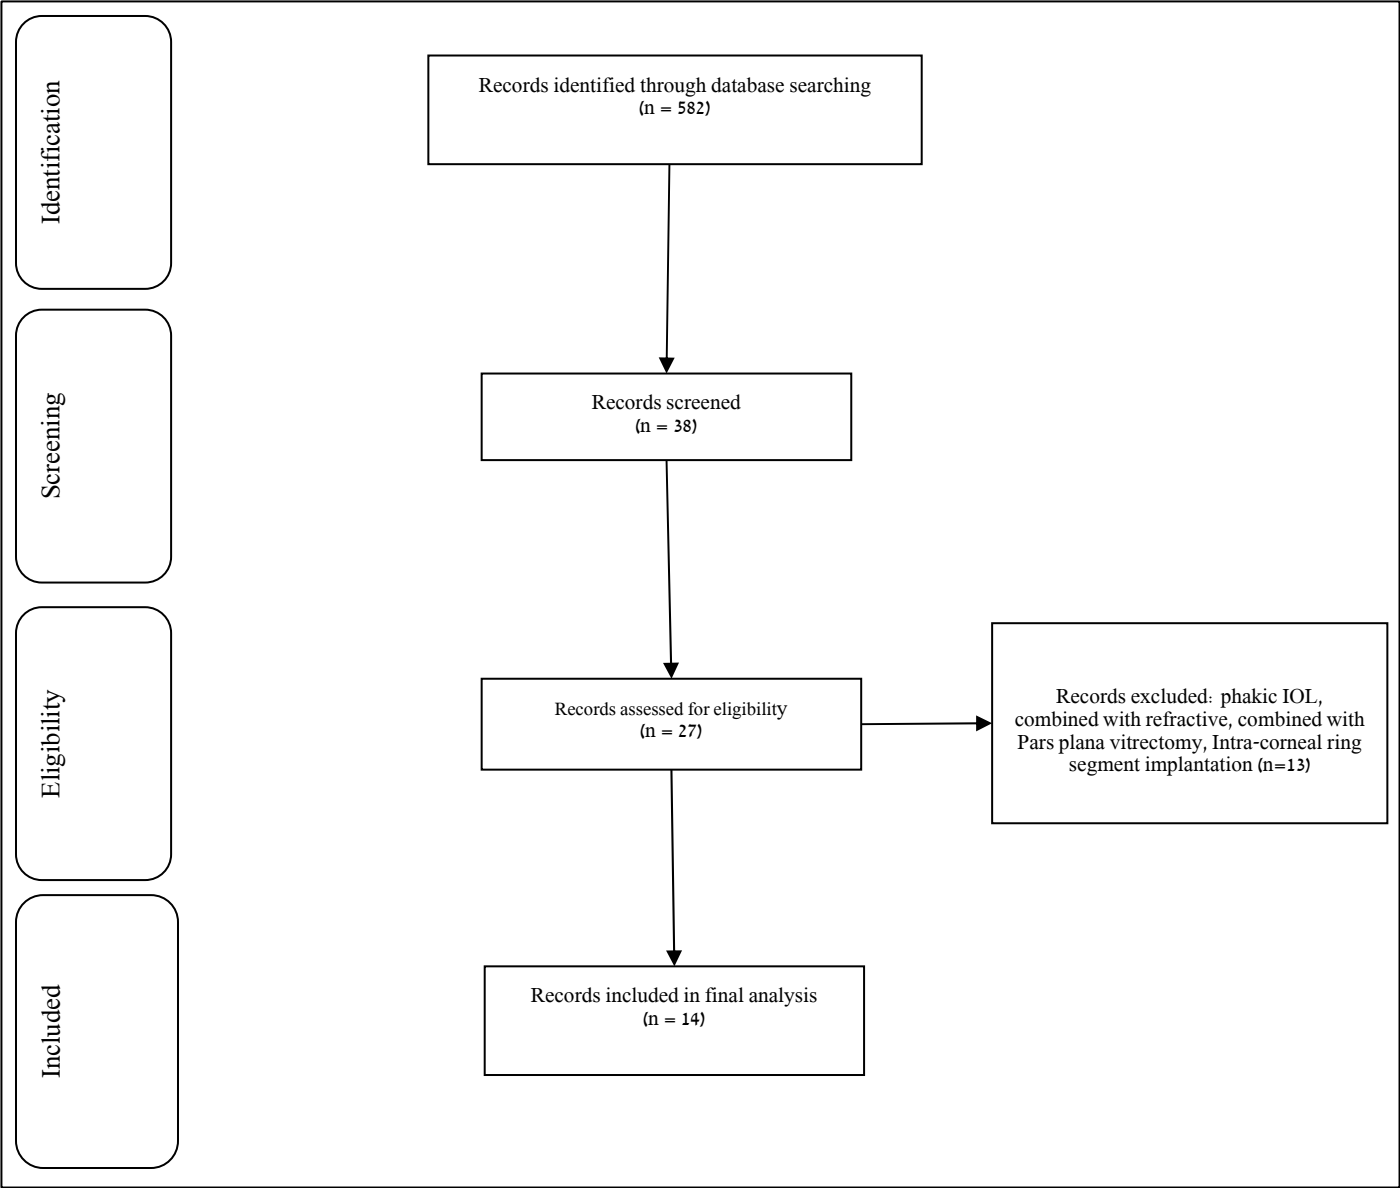

Supplement Table S1. Krumeich criteria for *Classification of Keratoconus*.

| Stage | Keratometry (mean K)                           |
|-------|------------------------------------------------|
| I     | < 48 D                                         |
| II    | 48 - 53 D                                      |
| III   | > 53 D                                         |
| IV    | unmeasurable refraction or with a central scar |

Supplement Table S2. Guidelines for target refraction in patients undergoing cataract surgery based on keratoconus (KC) grade by the Krumeich criteria.

| KC grade  | Watson et al. [25]                                                                                                                                                    | Kane et al. [11]         |
|-----------|-----------------------------------------------------------------------------------------------------------------------------------------------------------------------|--------------------------|
| Stage I   | -1.0 D                                                                                                                                                                | No adjustment            |
| Stage II  | -1.5 D                                                                                                                                                                | Between -0.75 and -1.5 D |
| Stage III | Actual K values may result in significant hyperopic surprise; hence the use of standard K values should be explored. This grade has no refractive aim recommendation. | Between -2.0 and -3.0 D  |

Supplement Table S3: IOL formula characteristics.

| IOL power formula  | Parameters used for ELP prediction                                                                                                                       | Recommended eye type                                                                                                                                                                                       | Description                                                                                                                                                                                                                                                                                                                                                                |
|--------------------|----------------------------------------------------------------------------------------------------------------------------------------------------------|------------------------------------------------------------------------------------------------------------------------------------------------------------------------------------------------------------|----------------------------------------------------------------------------------------------------------------------------------------------------------------------------------------------------------------------------------------------------------------------------------------------------------------------------------------------------------------------------|
| <b>Barrett</b>     | AL, corneal power, ACD (optional), lens thickness (optional), white-to-white corneal diameter (optional).                                                | Recommended for short – long eyes.                                                                                                                                                                         | The important difference between formulas is that the location of the principle plane of refraction of the IOL is retained as a relevant variable in the formula(1).                                                                                                                                                                                                       |
| <b>Haigis</b>      | AL and ACD.                                                                                                                                              | Haigis ( $a_0$ optimized only): normal eyes<br>Haigis ( $a_0, a_1, a_2$ optimized): short – long eyes                                                                                                      | Based on a three-variable ( $a_0, a_1$ and $a_2$ ) function. The measured ACD is linked to the $a_1$ constant, while the measured AL is tied to the $a_2$ constant. Using double-regression analysis, all three constants may be optimized for a wide variety of ALs and ACDs(2).                                                                                          |
| <b>Hoffer Q</b>    | AL and corneal power                                                                                                                                     | Used for eyes measuring < 22 mm                                                                                                                                                                            | Based on a personalized ACD, AL, and corneal curvature. Any series of an IOL style can be used to create the personalized ACD. It contains a factor that increases ACD as AL increases, a factor that increases ACD when corneal curvature increases, a factor that moderates the change in ACD for exceptionally long and short eyes, and a constant added to the ACD(3). |
| <b>Holladay I</b>  | AL and corneal power                                                                                                                                     | Used for eyes measuring between 24.6 mm – 26.0 mm                                                                                                                                                          | Calculates a tailored surgeon factor using the postoperative refraction value, the dioptric power of the implanted IOL, and the preoperative corneal and AL measurement. The distance between the post-operative anterior iris plane and the effective optical plane of the IOL is thus termed as the surgeon factor (4).                                                  |
| <b>Holladay II</b> | AL, corneal power, ACD, lens thickness (optional), age (optional), white to-white corneal diameter (optional), pre-operative refraction data (optional). | Recommended for short – long* eyes. W-K adjustment has been shown to extend the usage from "short – normal eyes" to "short – long eyes" for meniscus IOLs designs in the low plus to minus power range(2). | Similar to the Holladay I method, but it predicts the surgeon factor using seven parameters: AL, corneal power, ACD, lens thickness, age, white-to-white corneal diameter, and pre-operative refraction.                                                                                                                                                                   |
| <b>SRK, SRKII</b>  |                                                                                                                                                          |                                                                                                                                                                                                            | The SRK I and SRK II formulas are obsolete and should no longer be used(5).                                                                                                                                                                                                                                                                                                |
| <b>SRK/T</b>       | AL and corneal power                                                                                                                                     | Used for eyes > 26 mm. A combination of                                                                                                                                                                    | Under the SRK umbrella of empirical formulae, the SRK/T                                                                                                                                                                                                                                                                                                                    |

|                     |                                      |                                                                      |                                                                                                                                                                                                                                                                                                                             |
|---------------------|--------------------------------------|----------------------------------------------------------------------|-----------------------------------------------------------------------------------------------------------------------------------------------------------------------------------------------------------------------------------------------------------------------------------------------------------------------------|
|                     |                                      | Hoffer Q, Holladay 1, and SRK/T should be used for eyes 22.0–24.5 mm | formula is using a known A-constants and optimization approaches. The SRK/T model's empirical optimization approaches include postoperative ACD prediction, a retina thickness correction factor, and corneal refractive index(6).                                                                                          |
| <b>Kane</b>         | AL, keratometry, ACD, CCT and gender | Long eyes (26.0 mm) and short eyes (22.0 mm).                        | Kane formula in refractive prediction was comparable in IOL power calculation, marking its superiority over many conventional IOL formulas, such as HofferQ, Haigis, Holladay1, and Holladay2 (7).                                                                                                                          |
| <b>Kane (K*)</b>    | AL, keratometry, ACD, CCT and gender | Keratoconus                                                          | Available at <a href="http://www.iolformula.com">www.iolformula.com</a> . It uses a modified corneal power derived from anterior corneal radius of curvature that better represents the true anterior/posterior ratio in keratoconic eyes while also aiming to minimize the corneal power effect on the ELP calculation(8). |
| <b>Z calculator</b> | AL, keratometry and ACD              | Toric IOL                                                            | A calculation of the ZEISS toric IOLs ZEISS premium refractive toric IOLs , Access Z CALC at <a href="http://www.iolmaster-online.zeiss.com">www.iolmaster-online.zeiss.com</a>                                                                                                                                             |

AL; axial length, ACD; anterior chamber depth, CCT; central corneal thickness. K\*; keratoconus adjustment.

1. Barrett GD. An improved universal theoretical formula for intraocular lens power prediction. J Cataract Refract Surg [Internet]. 1993 [cited 2022 Apr 13];19(6):713–20. Available from: <https://pubmed.ncbi.nlm.nih.gov/8271166/>
2. IOL Power Calculations Which Formula? [Internet]. [cited 2022 Apr 13]. Available from: <https://doctor-hill.com/>
3. Hoffer KJ. The Hoffer Q formula: A comparison of theoretic and regression formulas. J Cataract Refract Surg [Internet]. 1993 [cited 2022 Apr 13];19(6):700–12. Available from: [https://journals.lww.com/jcrs/Fulltext/1993/11000/The\\_Hoffer\\_Q\\_formula\\_\\_A\\_comparison\\_of\\_theoretic.7.aspx](https://journals.lww.com/jcrs/Fulltext/1993/11000/The_Hoffer_Q_formula__A_comparison_of_theoretic.7.aspx)
4. Holladay JT, Musgrove KH, Prager TC, Lewis JW, Chandler TY, Ruiz RS. A three-part system for refining intraocular lens power calculations. J Cataract Refract Surg. 1988 Jan 1;14(1):17–24.
5. Németh J, Fekete O, Pesztenlehrer N. Optical and ultrasound measurement of axial length and anterior chamber depth for intraocular lens power calculation. J Cataract Refract Surg [Internet]. 2003 Jan 1 [cited 2022 Apr 13];29(1):85–8. Available from: <https://pubmed.ncbi.nlm.nih.gov/12551672/>
6. Retzlaff JA, Sanders DR, Kraff MC. Development of the SRK/T intraocular lens implant power calculation formula. J Cataract Refract Surg [Internet]. 1990 [cited 2022 Apr 14];16(3):333–40. Available from: <https://pubmed.ncbi.nlm.nih.gov/2355321/>
7. Ryu S, Jun I, Kim TI, Kim EK, Seo KY. Accuracy of the Kane Formula for Intraocular Lens Power Calculation in Comparison with Existing Formulas: A Retrospective Review. Yonsei Med J [Internet]. 2021 Dec 1 [cited 2022 Apr 13];62(12):1117. Available from: [/pmc/articles/PMC8612861/](https://pmc/articles/PMC8612861/)

8. Kane JX, Connell B, Yip H, McAlister JC, Beckingsale P, Snibson GR, et al. Accuracy of Intraocular Lens Power Formulas Modified for Patients with Keratoconus. In: Ophthalmology [Internet]. Elsevier Inc.; 2020 [cited 2021 Jan 28]. p. 1037–42. Available from: <https://pubmed.ncbi.nlm.nih.gov/32279887/>
